# Supplementary material for: Addressing Adolescent Depression in Tanzania: Positive Primary Care Workforce Outcomes Using a Training Cascade Model
Source: Depress Res Treat. 2017 Nov 26;2017:9109086. doi: 10.1155/2017/9109086 (PMC5733241; doi:10.1155/2017/9109086)
Supplement: Supplementary file 1 — Outcomes Evaluation Questionnaire. [file 9109086.f1.zip]

Archive with 1 entries (1 files):
- Suppl.docx
